# Supplementary material
Source: PubMed Central journal article supplement (PMC2736353)
Supplement: NIHMS128196-supplement-1_si_001.pdf [file NIHMS128196-supplement-1_si_001.pdf]

# On the Emerging Role of Chemistry in the Fashioning of Biologics: Synthesis of a Bidomainal Fucosyl GM1-Based Vaccine, for the Treatment of Small Cell Lung Cancer

*Pavel Nagorny,<sup>†</sup> Woo Han Kim,<sup>†</sup> Qian Wan,<sup>†</sup> Dongjoo Lee,<sup>†</sup> and Samuel J. Danishefsky<sup>†,‡,\*</sup>*

<sup>†</sup>Laboratory for Bioorganic Chemistry, Sloan-Kettering Institute for Cancer Research, 1275 York Avenue, New York, New York 10065 and <sup>‡</sup>Department of Chemistry, Columbia University, Havemeyer Hall, 3000 Broadway, New York, New York 10027

s-danishefsky@ski.mskcc.org

## Supporting Information

### Contents

|                                                             |       |
|-------------------------------------------------------------|-------|
| General Information                                         | 2     |
| Compound <b>4</b> ( <sup>1</sup> H and <sup>13</sup> C NMR) | 3-4   |
| Compound <b>5</b> ( <sup>1</sup> H and <sup>13</sup> C NMR) | 5-6   |
| Compound <b>7</b> ( <sup>1</sup> H NMR and LC/MS data)      | 7-9   |
| Compound <b>8a</b> ( <sup>1</sup> H NMR and LC/MS data)     | 10-12 |
| Compound <b>8</b> (LC/MS data)                              | 13-14 |
| Compound <b>9</b> ( <sup>1</sup> H NMR and LC/MS data)      | 15-17 |
| Compound <b>10b</b> ( <sup>1</sup> H NMR and LC/MS data)    | 18-20 |
| Compound <b>10</b> (LC/MS data)                             | 21-22 |
| Compound <b>11a</b> ( <sup>1</sup> H NMR and LC/MS data)    | 23-25 |
| Compound <b>11</b> ( <sup>1</sup> H NMR and LC/MS data)     | 26-28 |

## General Information

All reactions were carried out under an atmosphere of dried nitrogen in flame-dried or oven-dried glassware with magnetic stirring, unless otherwise noted. Air-sensitive reagents and solutions were transferred *via* syringe or cannula and were introduced to the apparatus through rubber septa. Reactions were cooled via external cooling baths: ice water (0 °C), dry ice-acetone (−78 °C), ice-acetone (−10 °C), or immersion cooler (−20 → −80 °C). Heating was accomplished by heating mantle or silicon oil bath using a temperature controller. Analytical thin layer chromatography (TLC) was performed on 0.25 mm silica gel 60-F plates. Visualization was accomplished with UV light and exposure to aqueous ceric ammonium molybdate (CAM) solution or anisaldehyde followed by heating. Flash chromatography was performed using silica gel 60 (230-240 mesh). Solvents for extraction and chromatography were HPLC grade.

When necessary, solvents and reagents were dried prior to use. Tetrahydrofuran (THF), dichloromethane (CH<sub>2</sub>Cl<sub>2</sub>), toluene, diethyl ether (Et<sub>2</sub>O) and Benzene were filtered through a column of activated alumina under an argon atmosphere. Pyridine, *N,N*-diisopropylethylamine, and triethylamine were distilled from calcium hydride. DBU (Diazabicycloundecene) and piperidine were purchased and used without further purification. HATU (*O*-(7-azabenzotriazol-1-yl)-*N,N,N',N'*-tetramethyluronium hexafluorophosphate) was purchased and used without further purification.

Analytical Equipment: <sup>1</sup>H- and <sup>13</sup>C NMR spectra were recorded on a 500 MHz, or a 600 MHz spectrometer in CDCl<sub>3</sub>, DMF-d<sub>7</sub>, CD<sub>3</sub>OD or D<sub>2</sub>O. Chemical shifts (δ) are reported from tetramethylsilane with the solvent resonance as the internal standard (CDCl<sub>3</sub>: δ 7.26; DMF-d<sub>7</sub>: δ 8.03; 2.92, 2.75; CD<sub>3</sub>OD: δ 4.78, 3.34; D<sub>2</sub>O: δ 4.65). Data are reported as follows: chemical shift (δ), multiplicity (s = singlet, d = doublet, t = triplet, q = quartet, br = broad, m = multiplet), coupling constants (Hz), integration, and assignment. <sup>13</sup>C NMR spectra were recorded with complete proton decoupling. Chemical shifts are reported in ppm from tetramethylsilane with the solvent as the internal standard (CDCl<sub>3</sub>: δ 77.0). HPLC purifications were run with TFA (trifluoroacetic acid)-buffered eluents: A = 0.05 % v/v TFA/Water, B = 0.04 % TFA/Acetonitrile using HPLC grade solvents.

\* Kimw12\_FUC\_GM1\_OPn (20 1) CDCI3 24.0C December\_14,2008\_22:17 Bruker AVII+ 600MHz RRL1326: zg30 : 1H 7.500 ppm \*

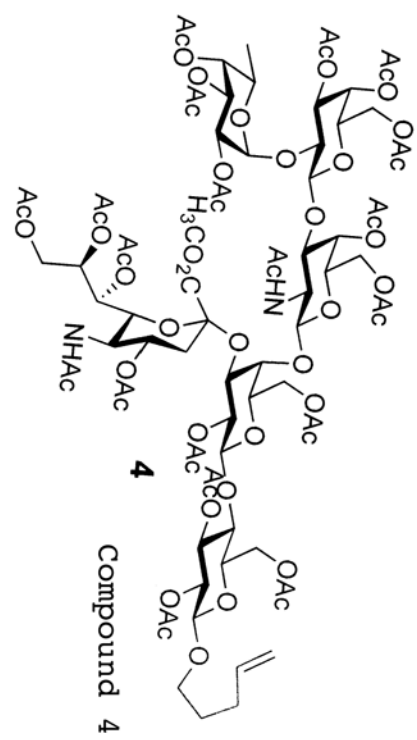

Compound 4

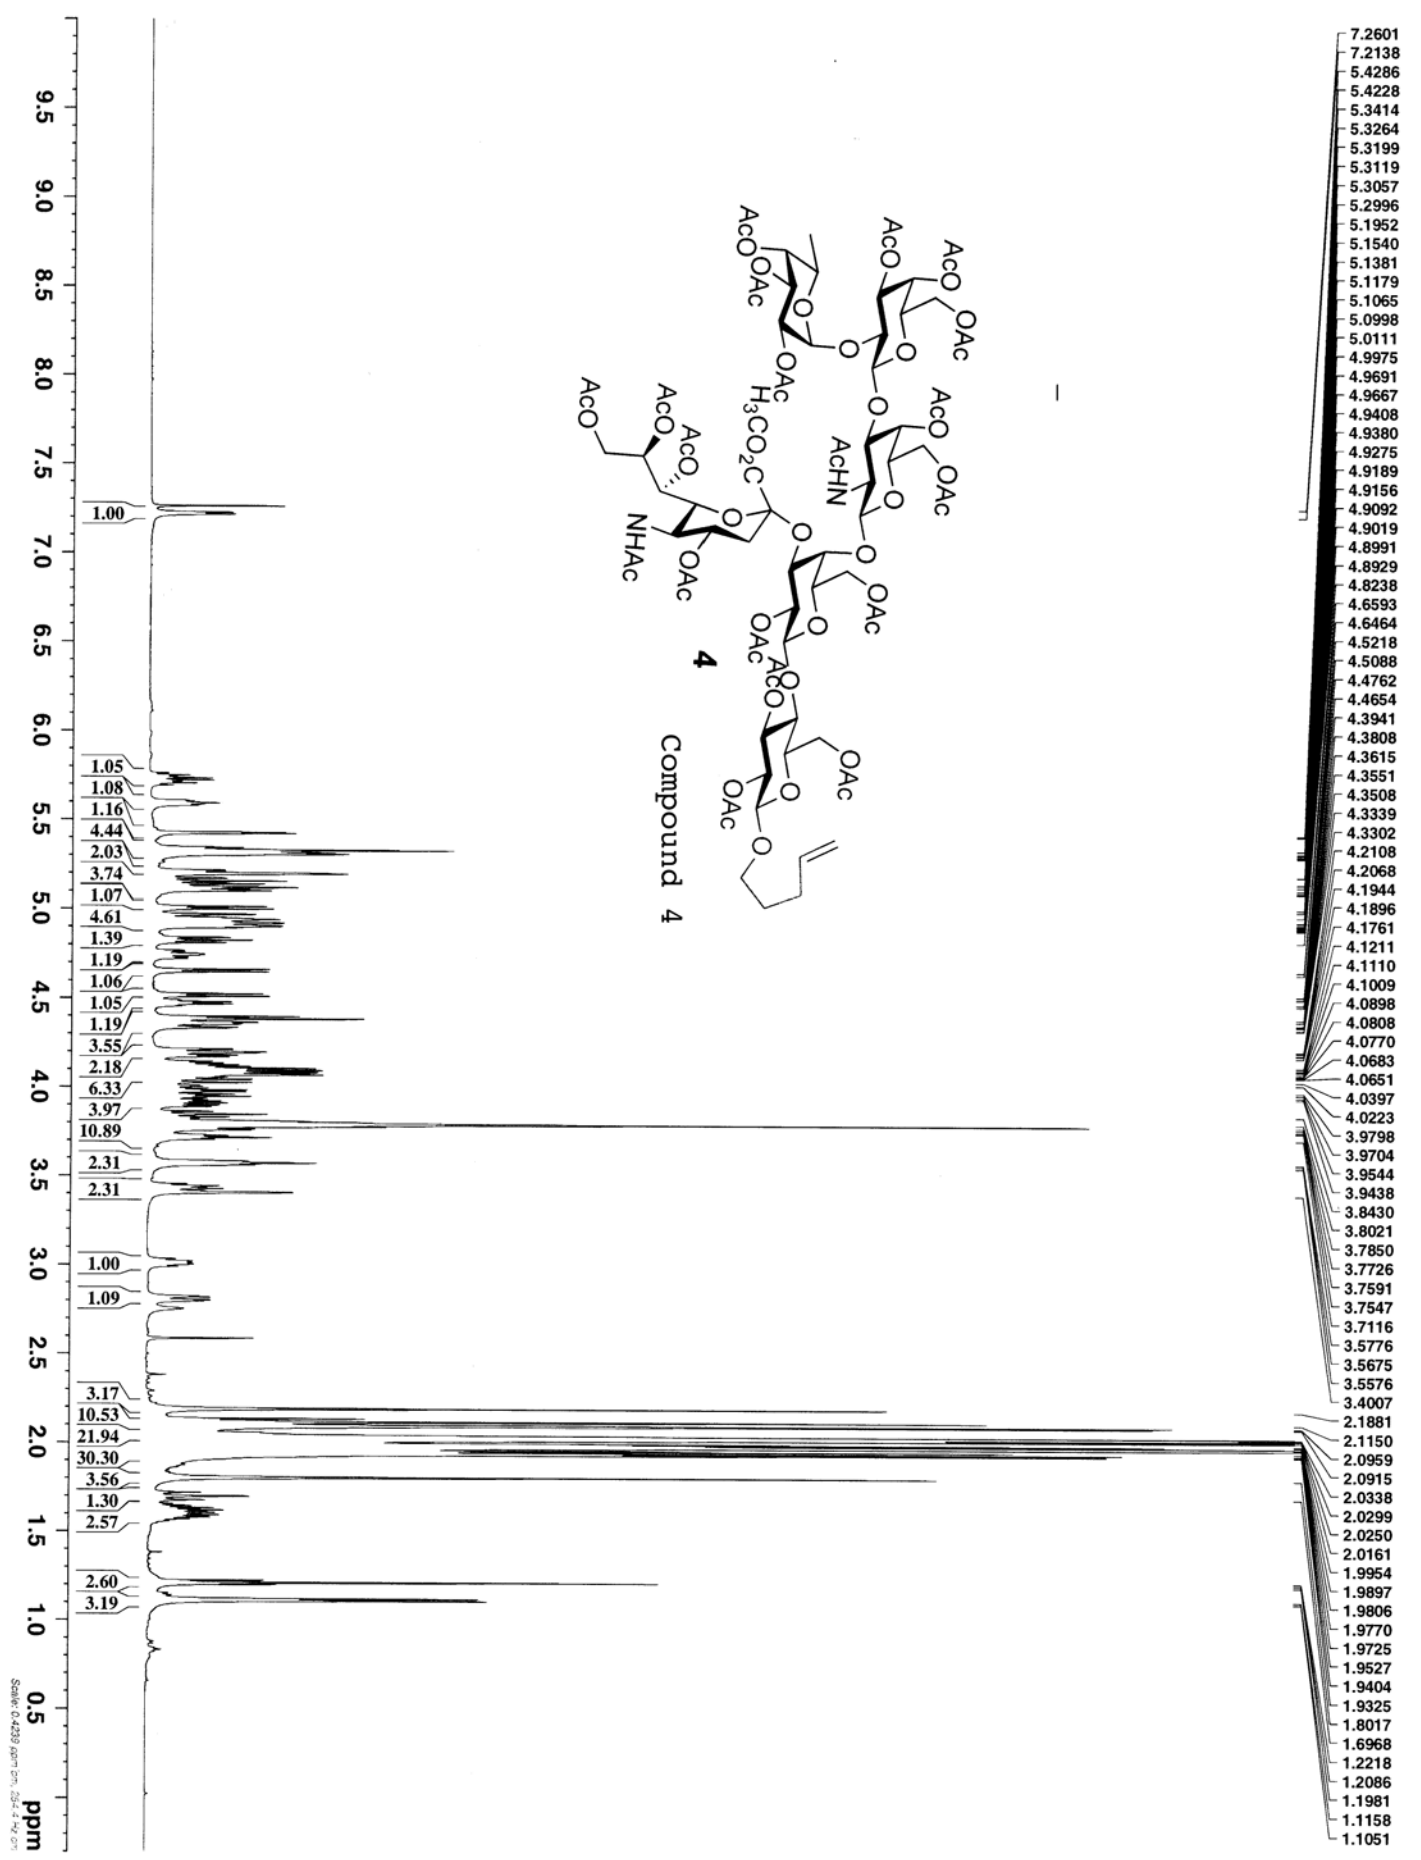

Scale: 0.4239 ppm/cm, 254.4 Hz/cm

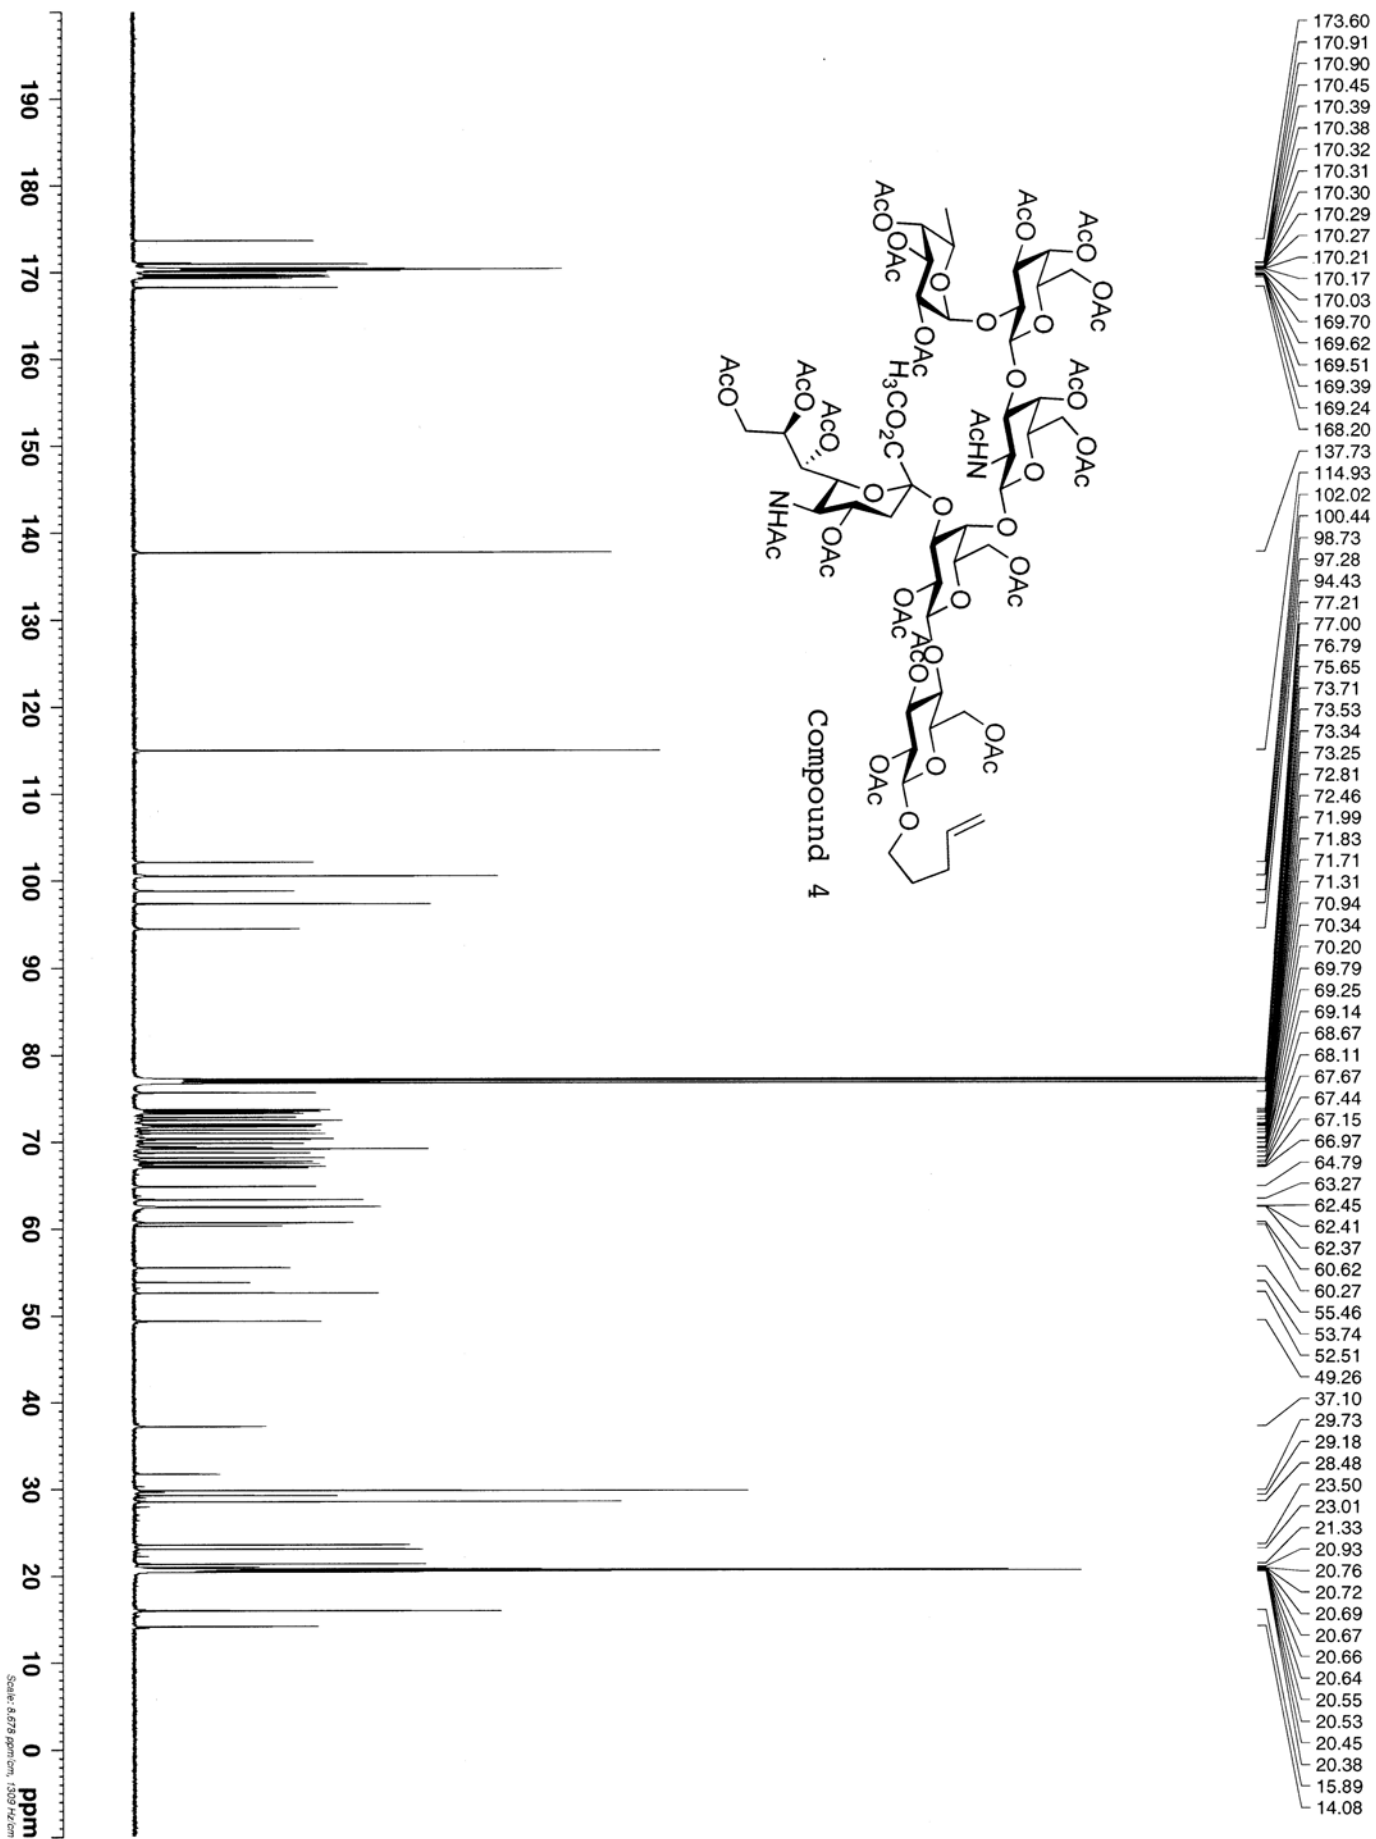

















SI-12

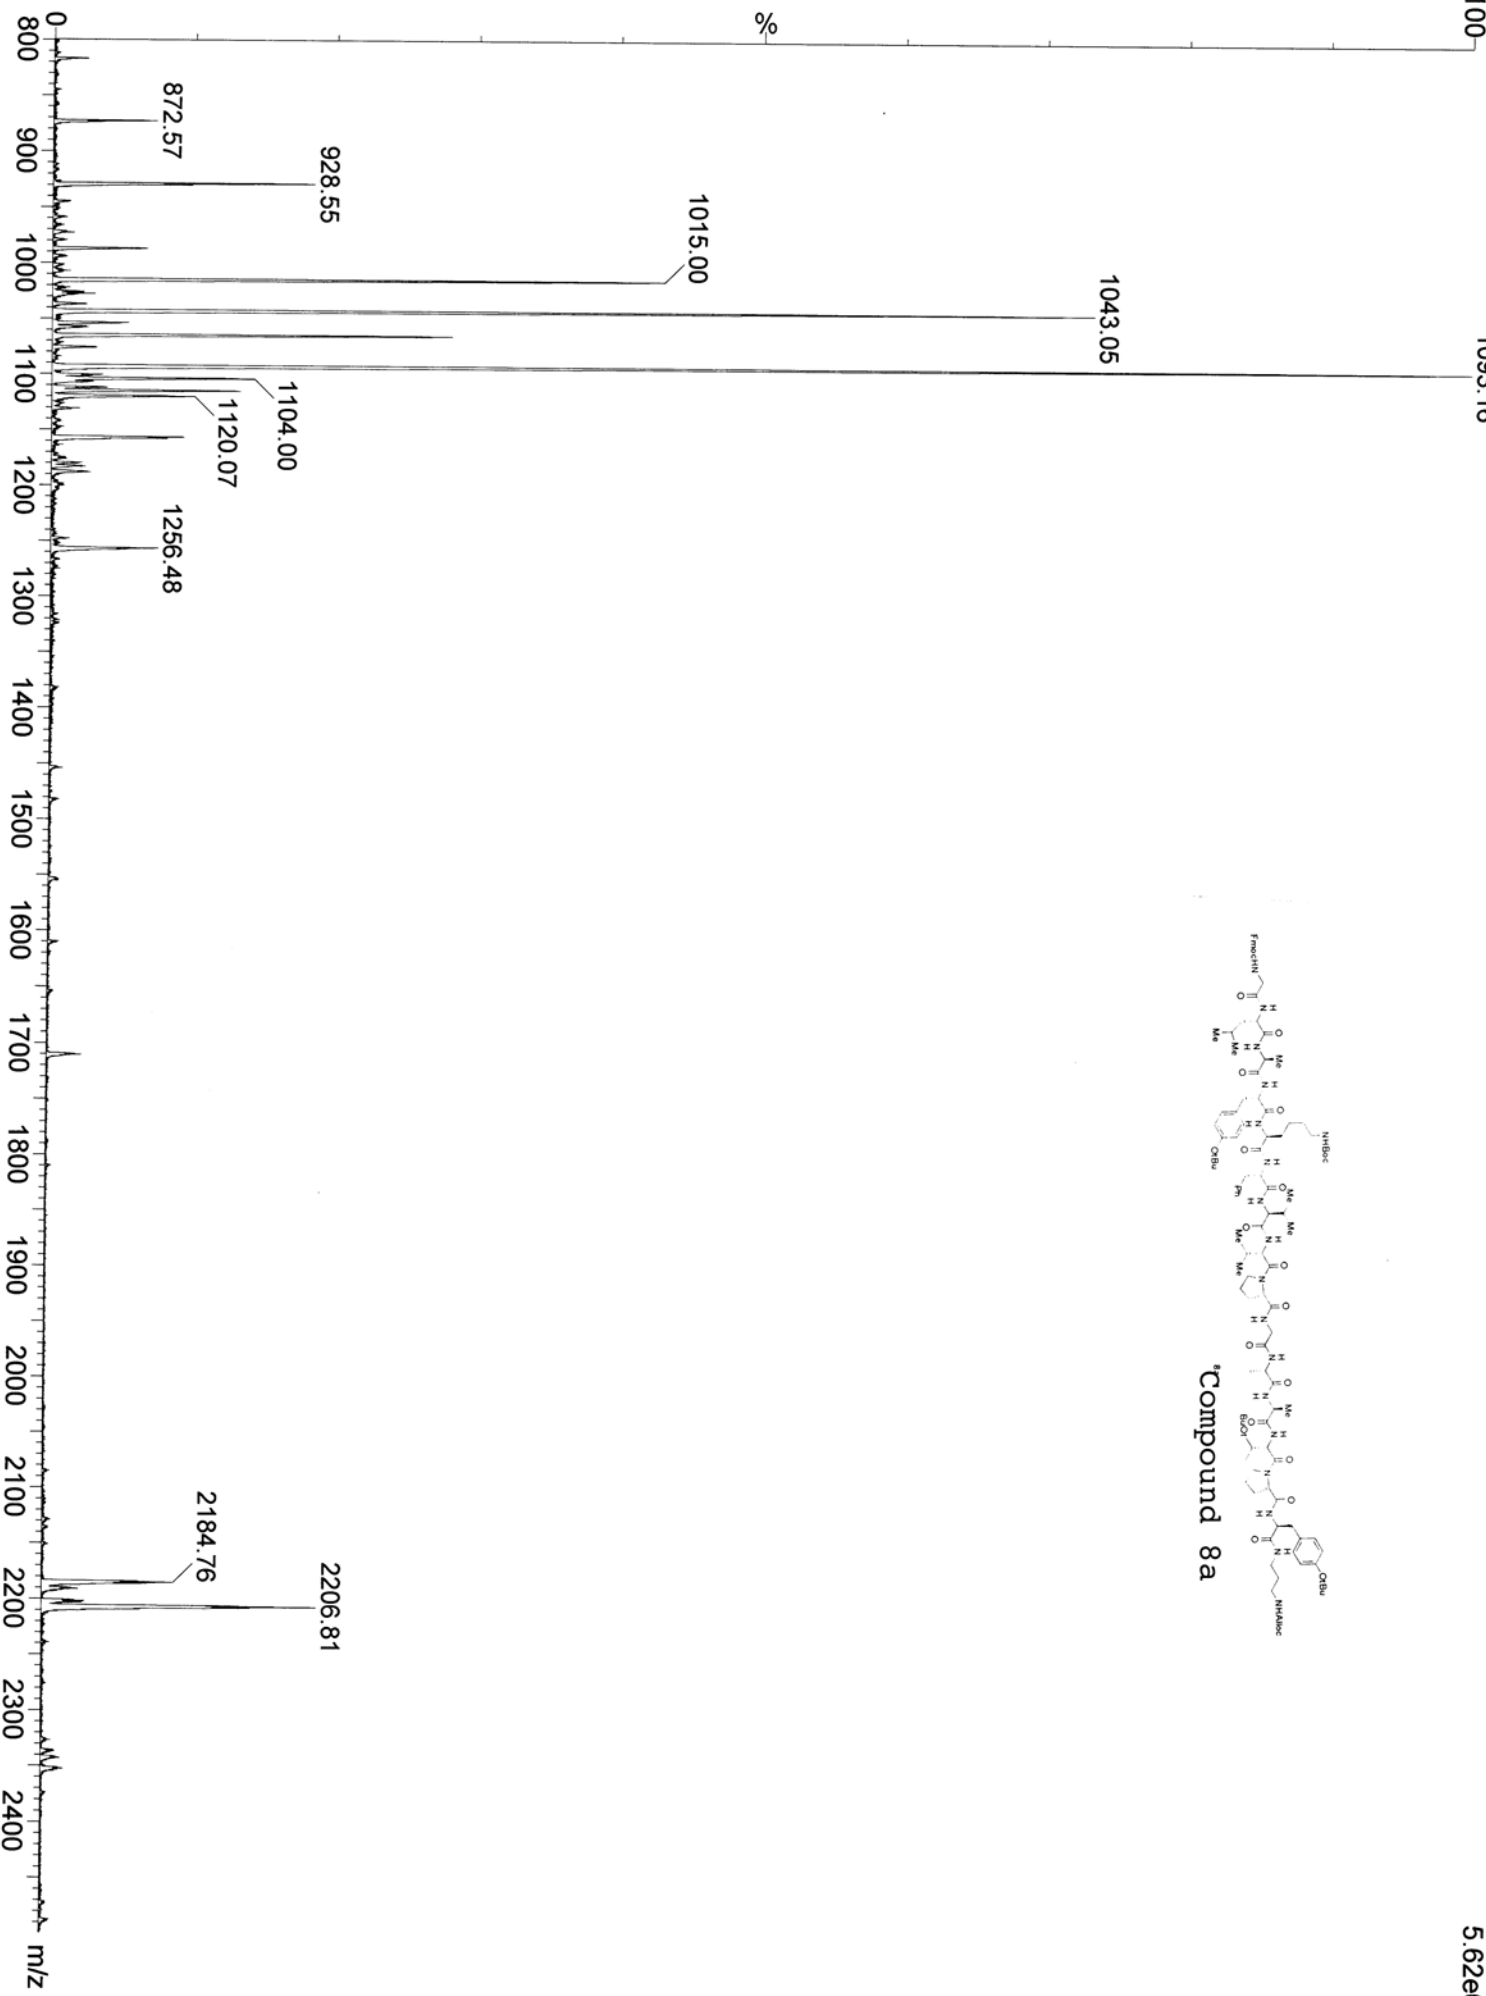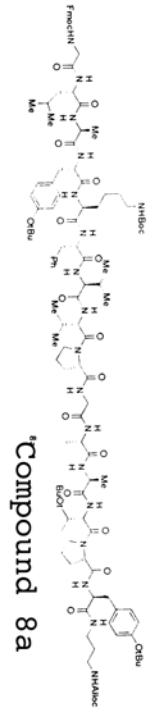





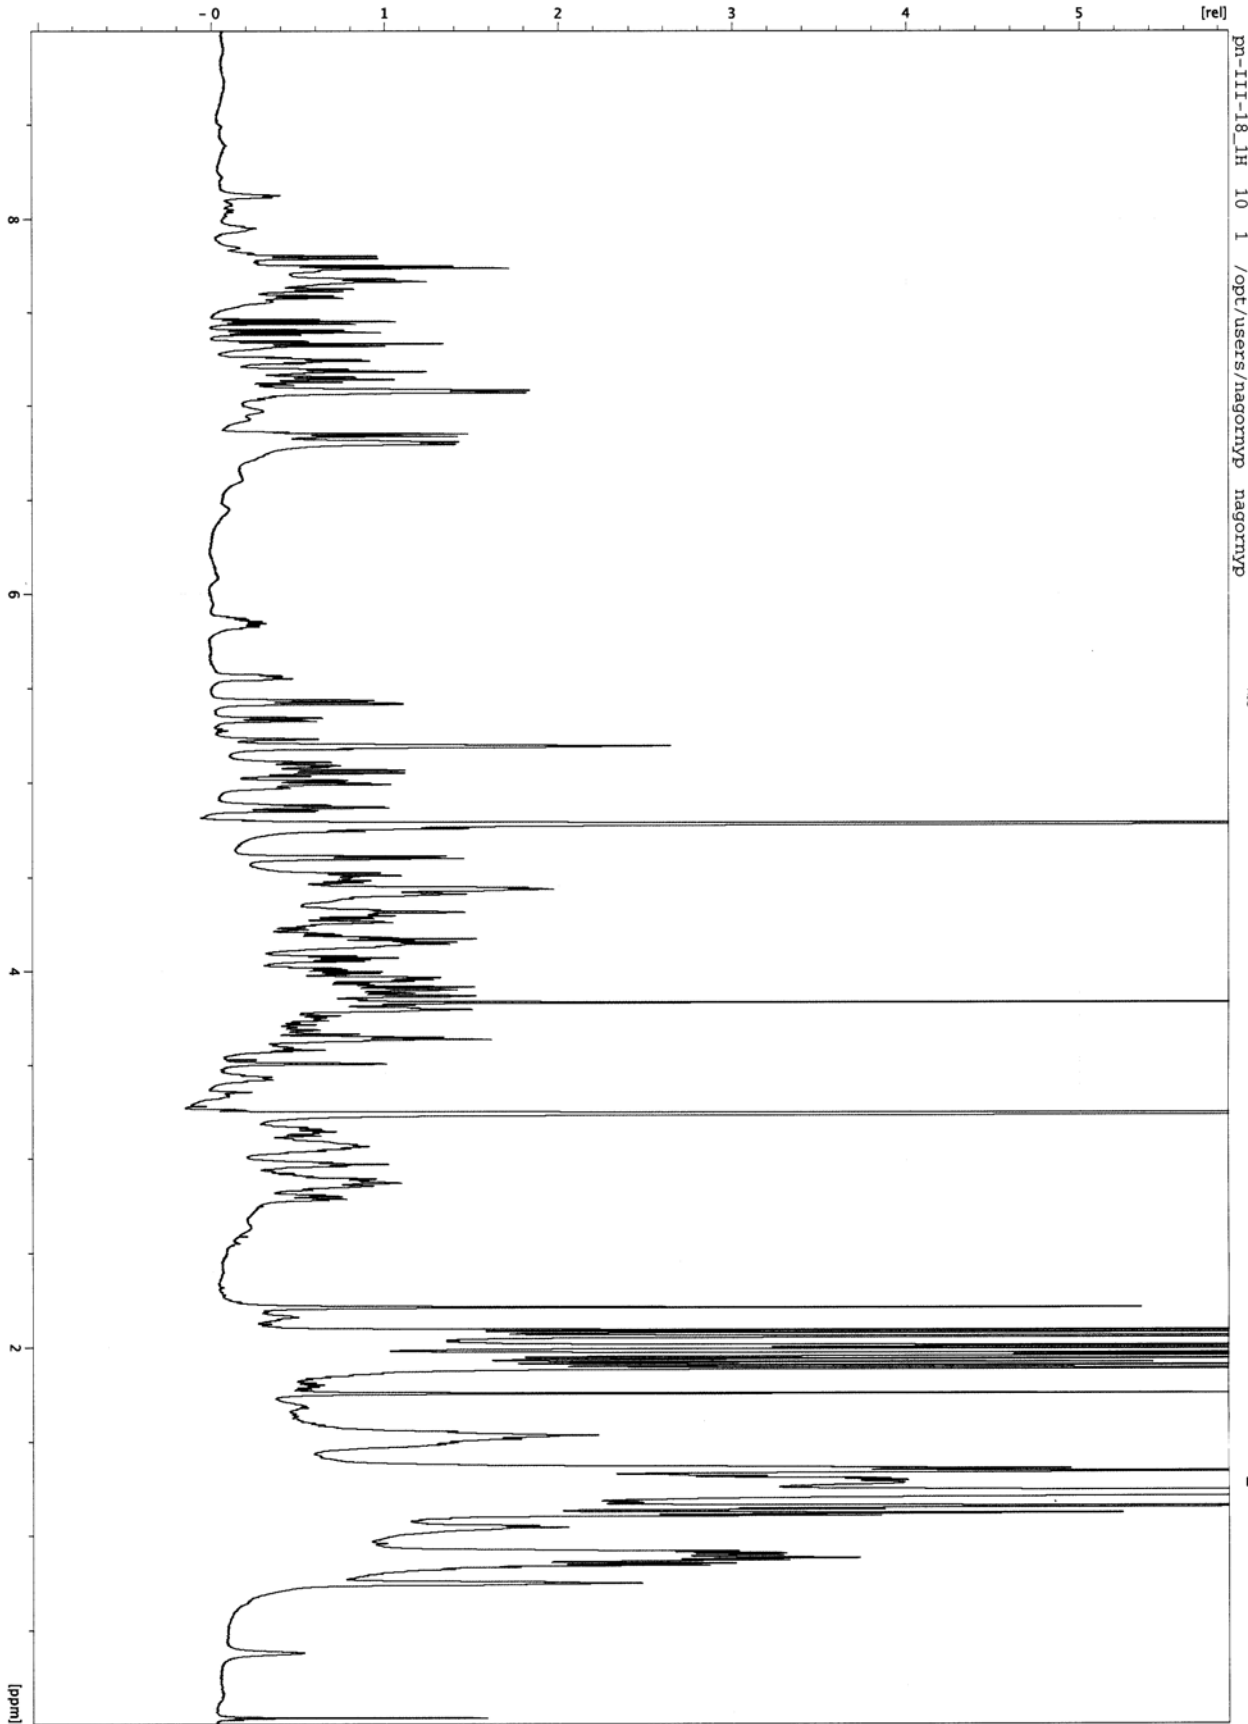





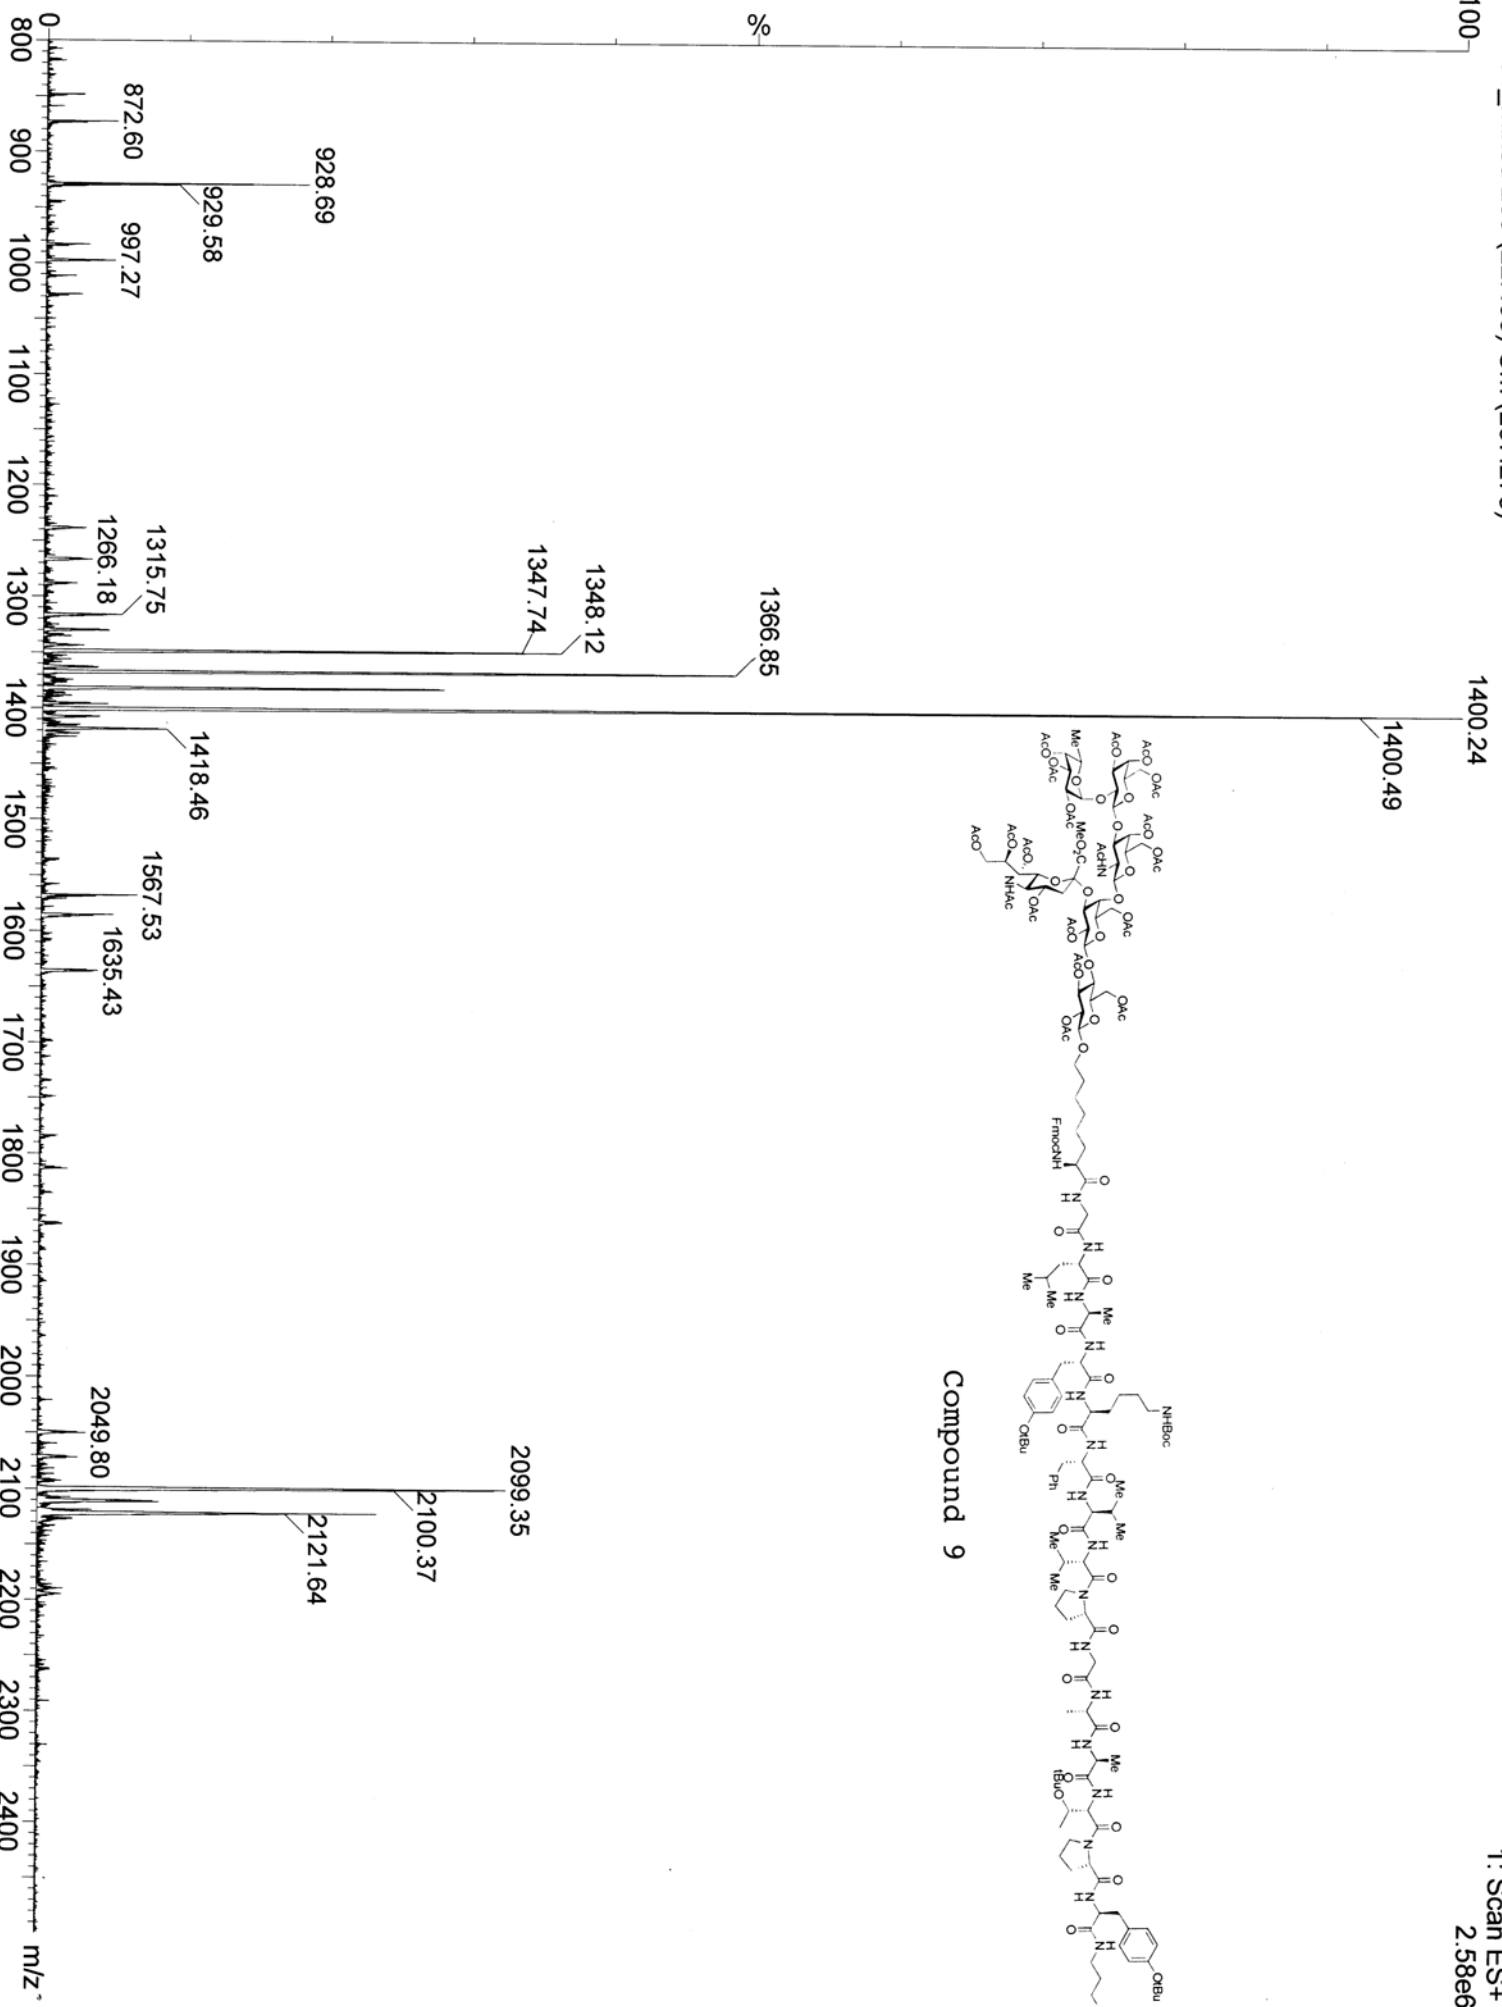



# Compound 10b

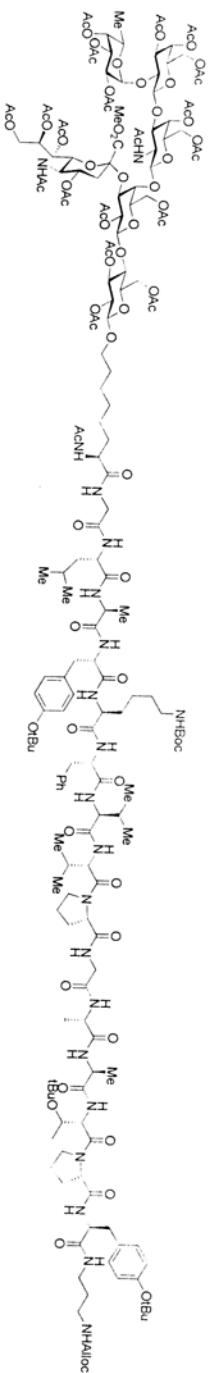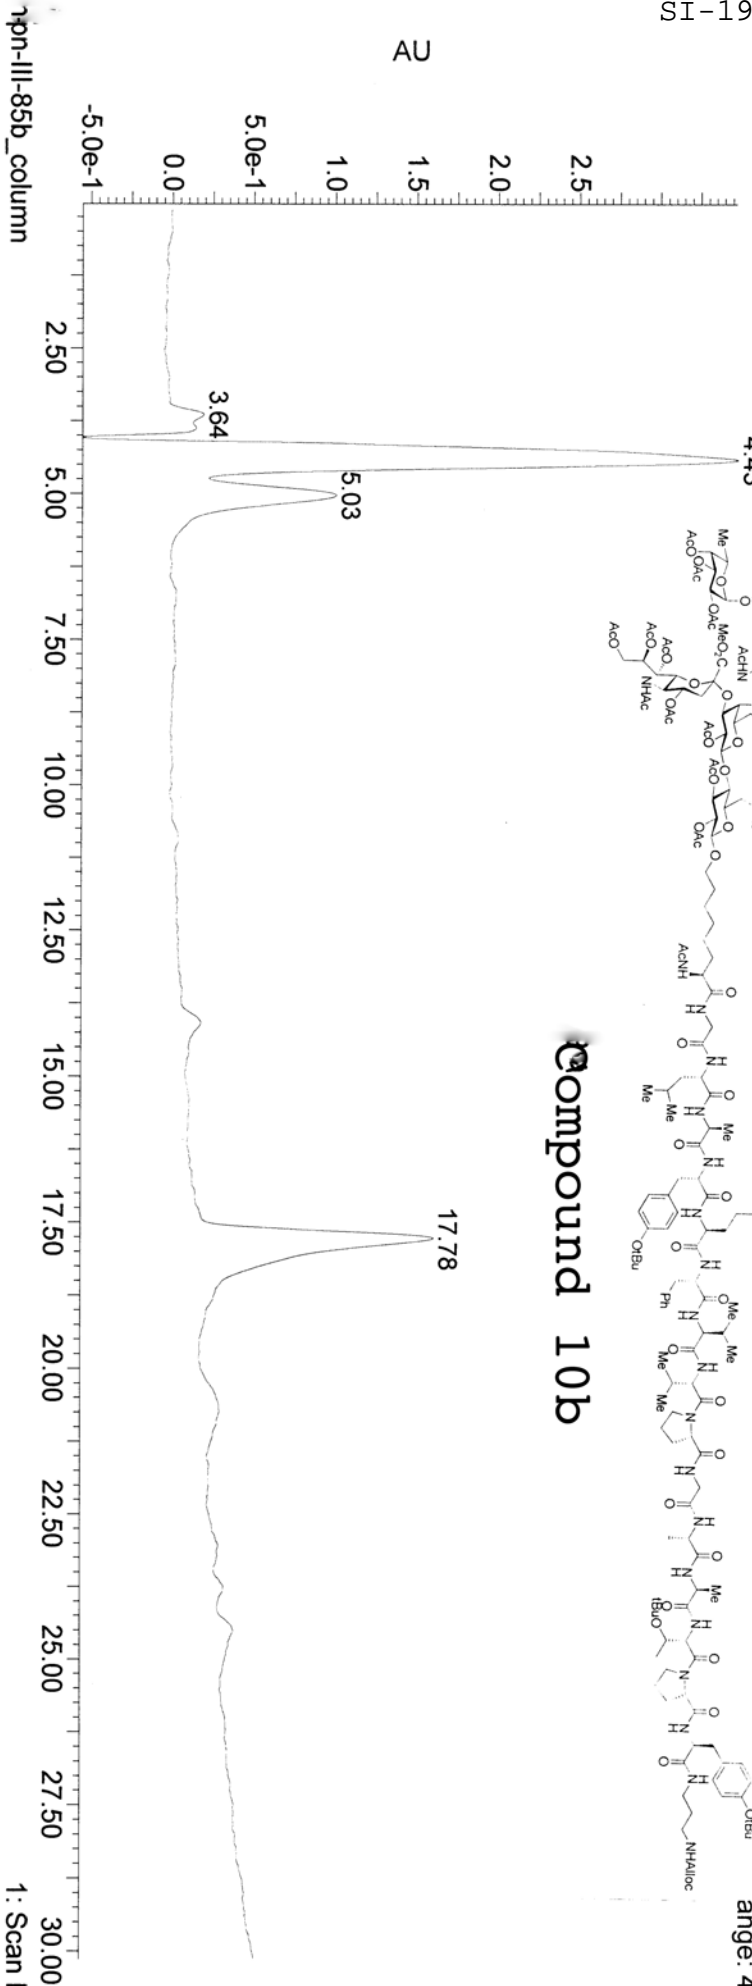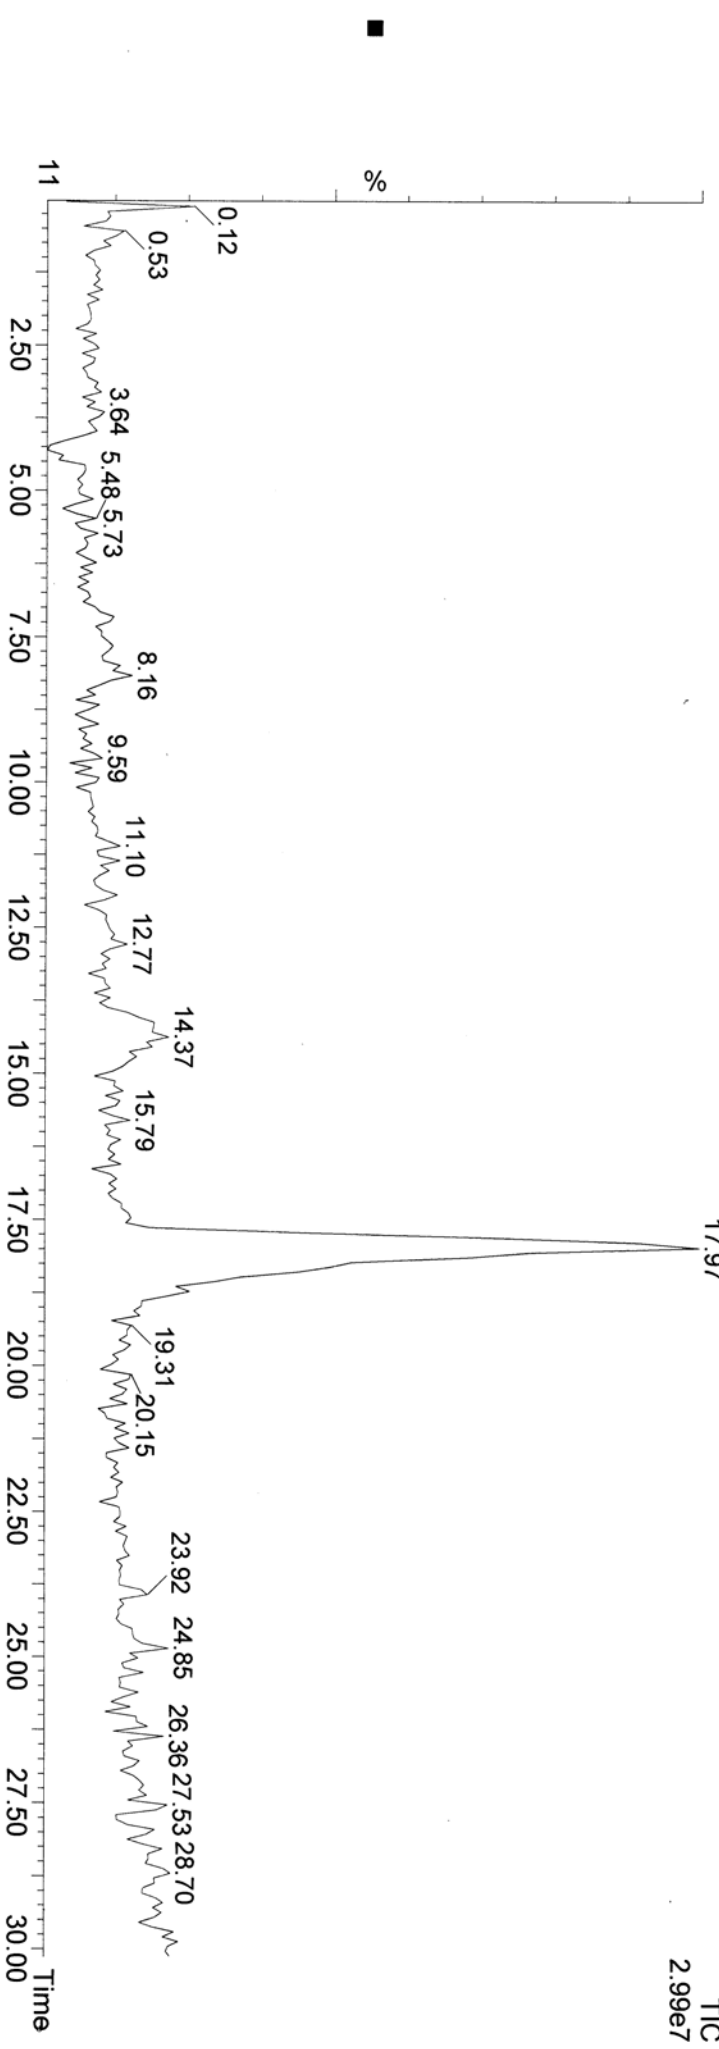

SI-20

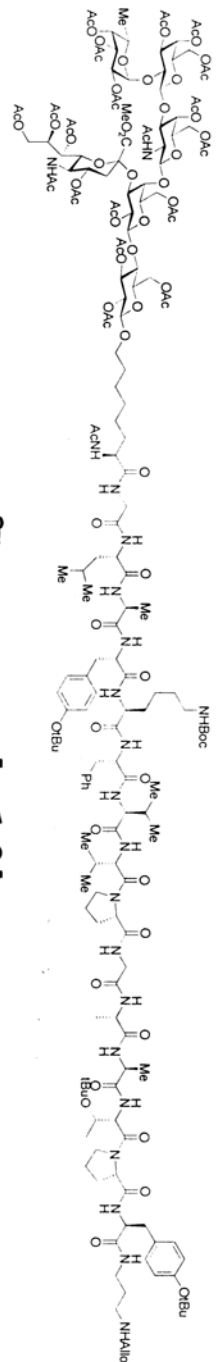

Compound 10b

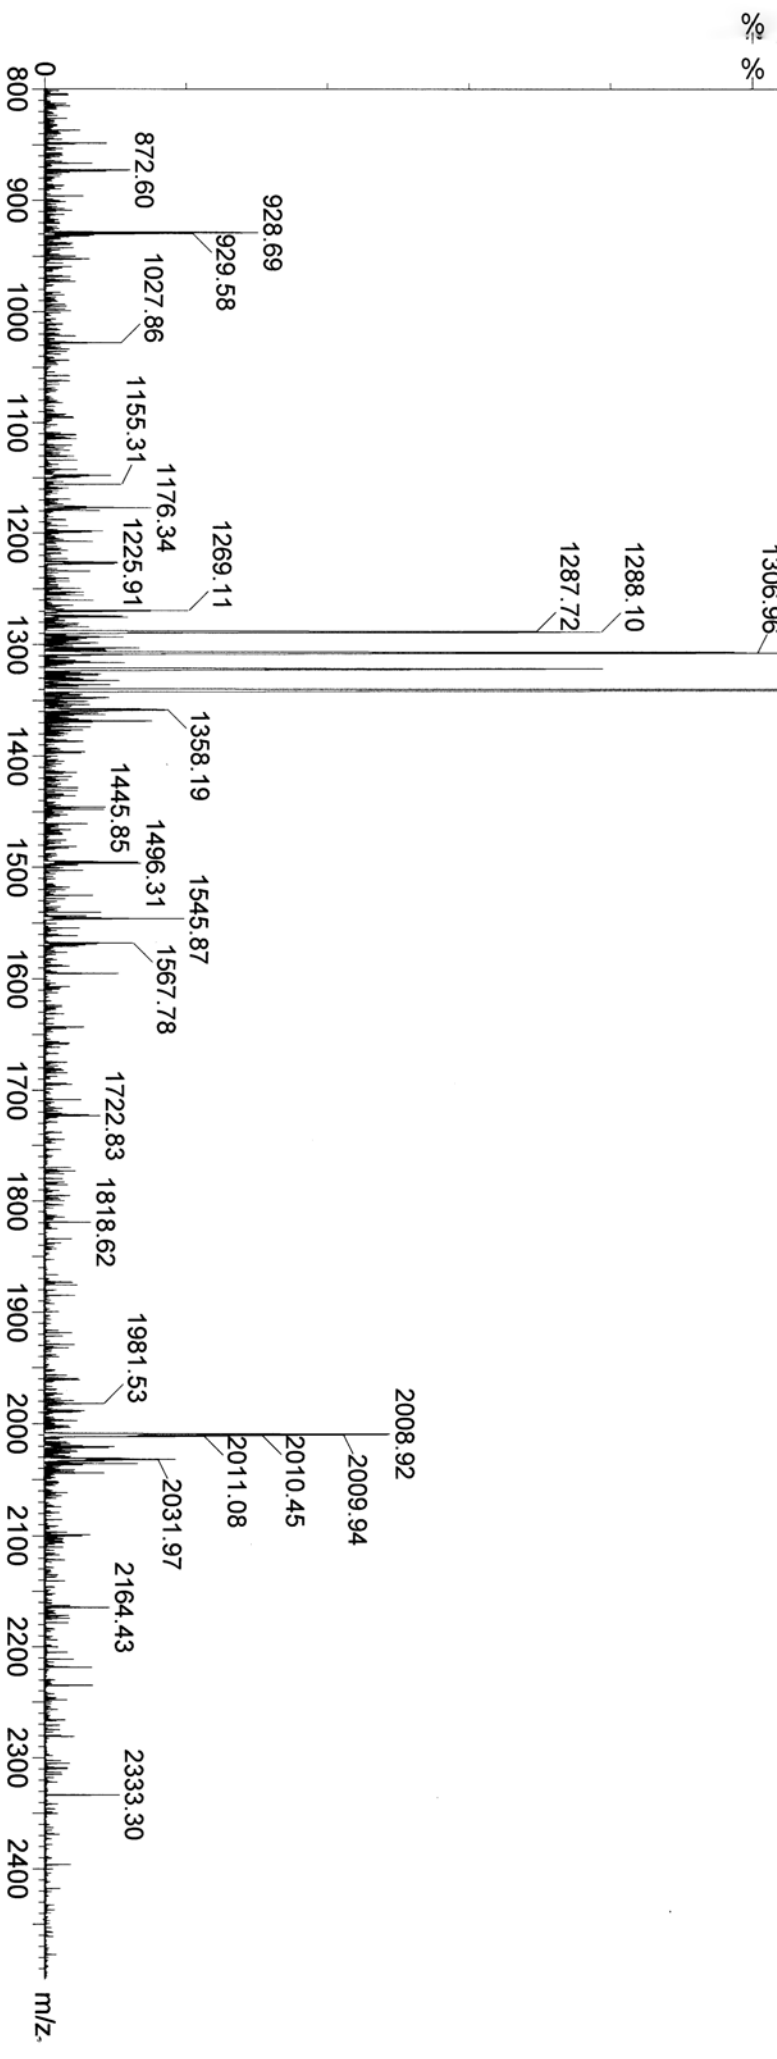

SI-21

AU

2.0e+2  
1.75e+2  
1.5e+2  
1.25e+2  
1.0e+2  
7.5e+1  
5.0e+1  
2.5e+1

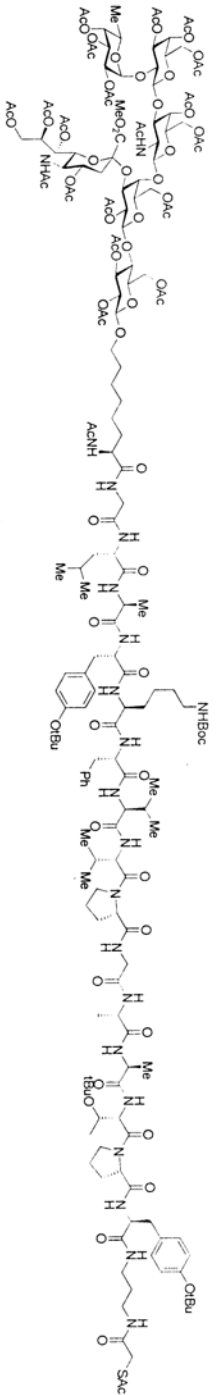

# Compound 10

pn-III-87b\_SAMMA

1: Scan ES+  
TIC  
1.56e8

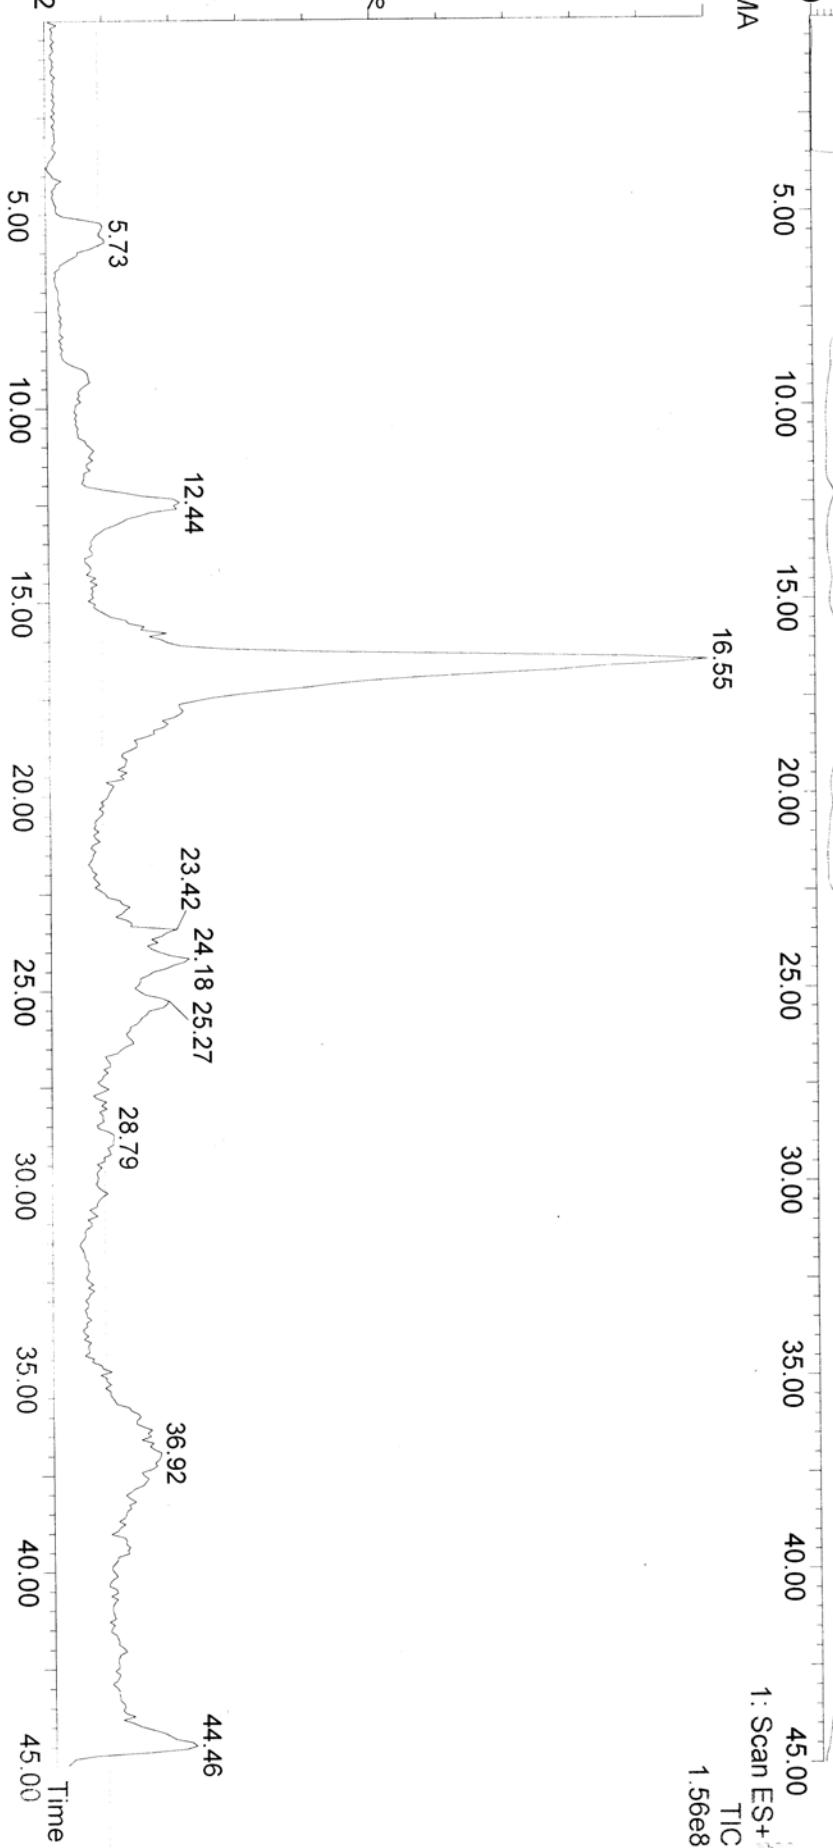

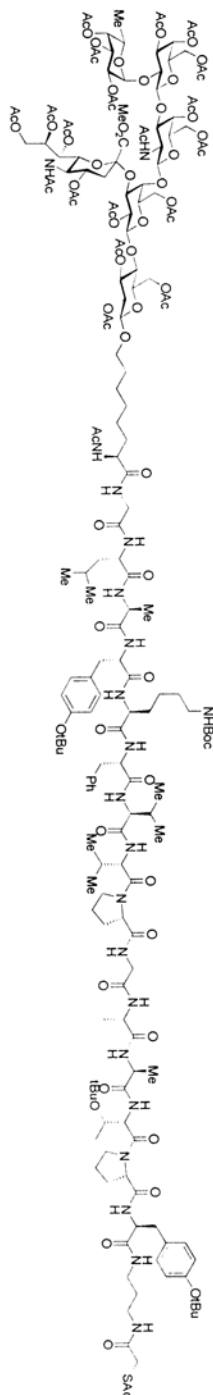

### Compound 10

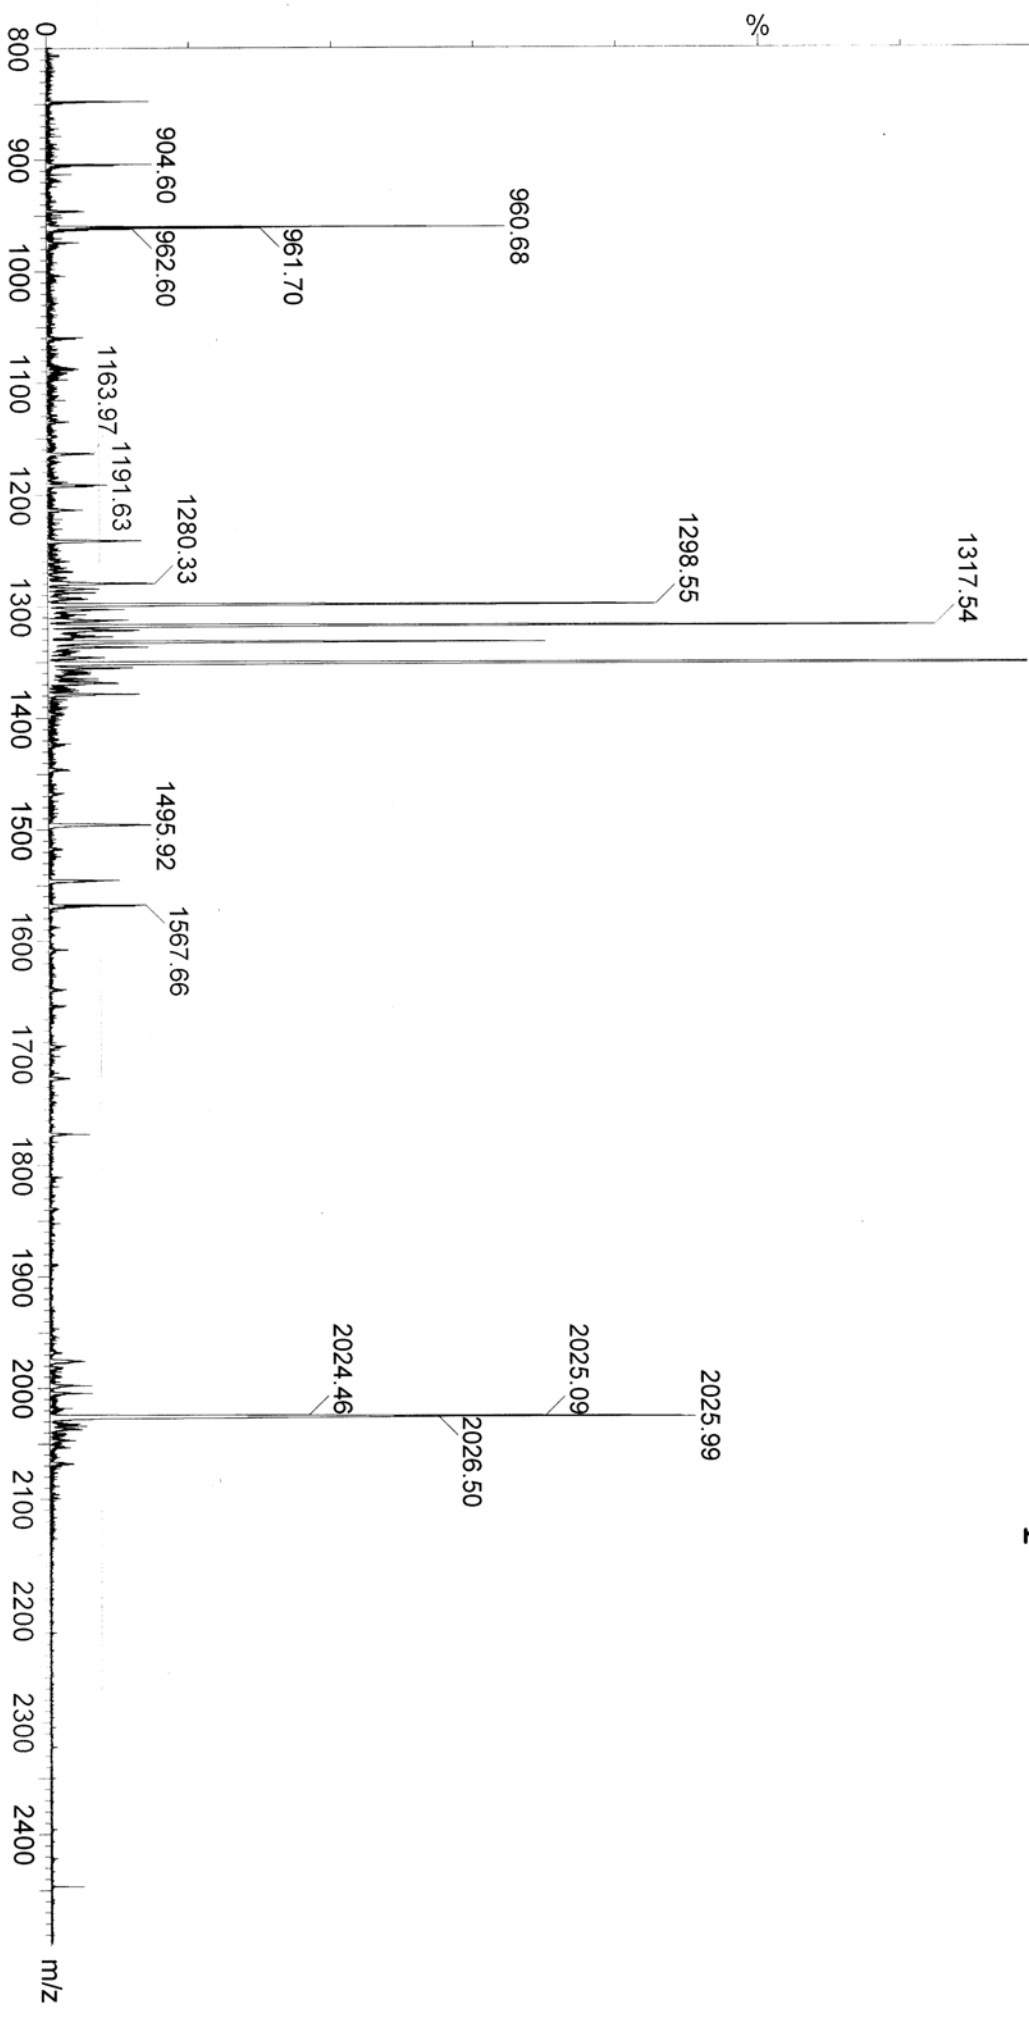

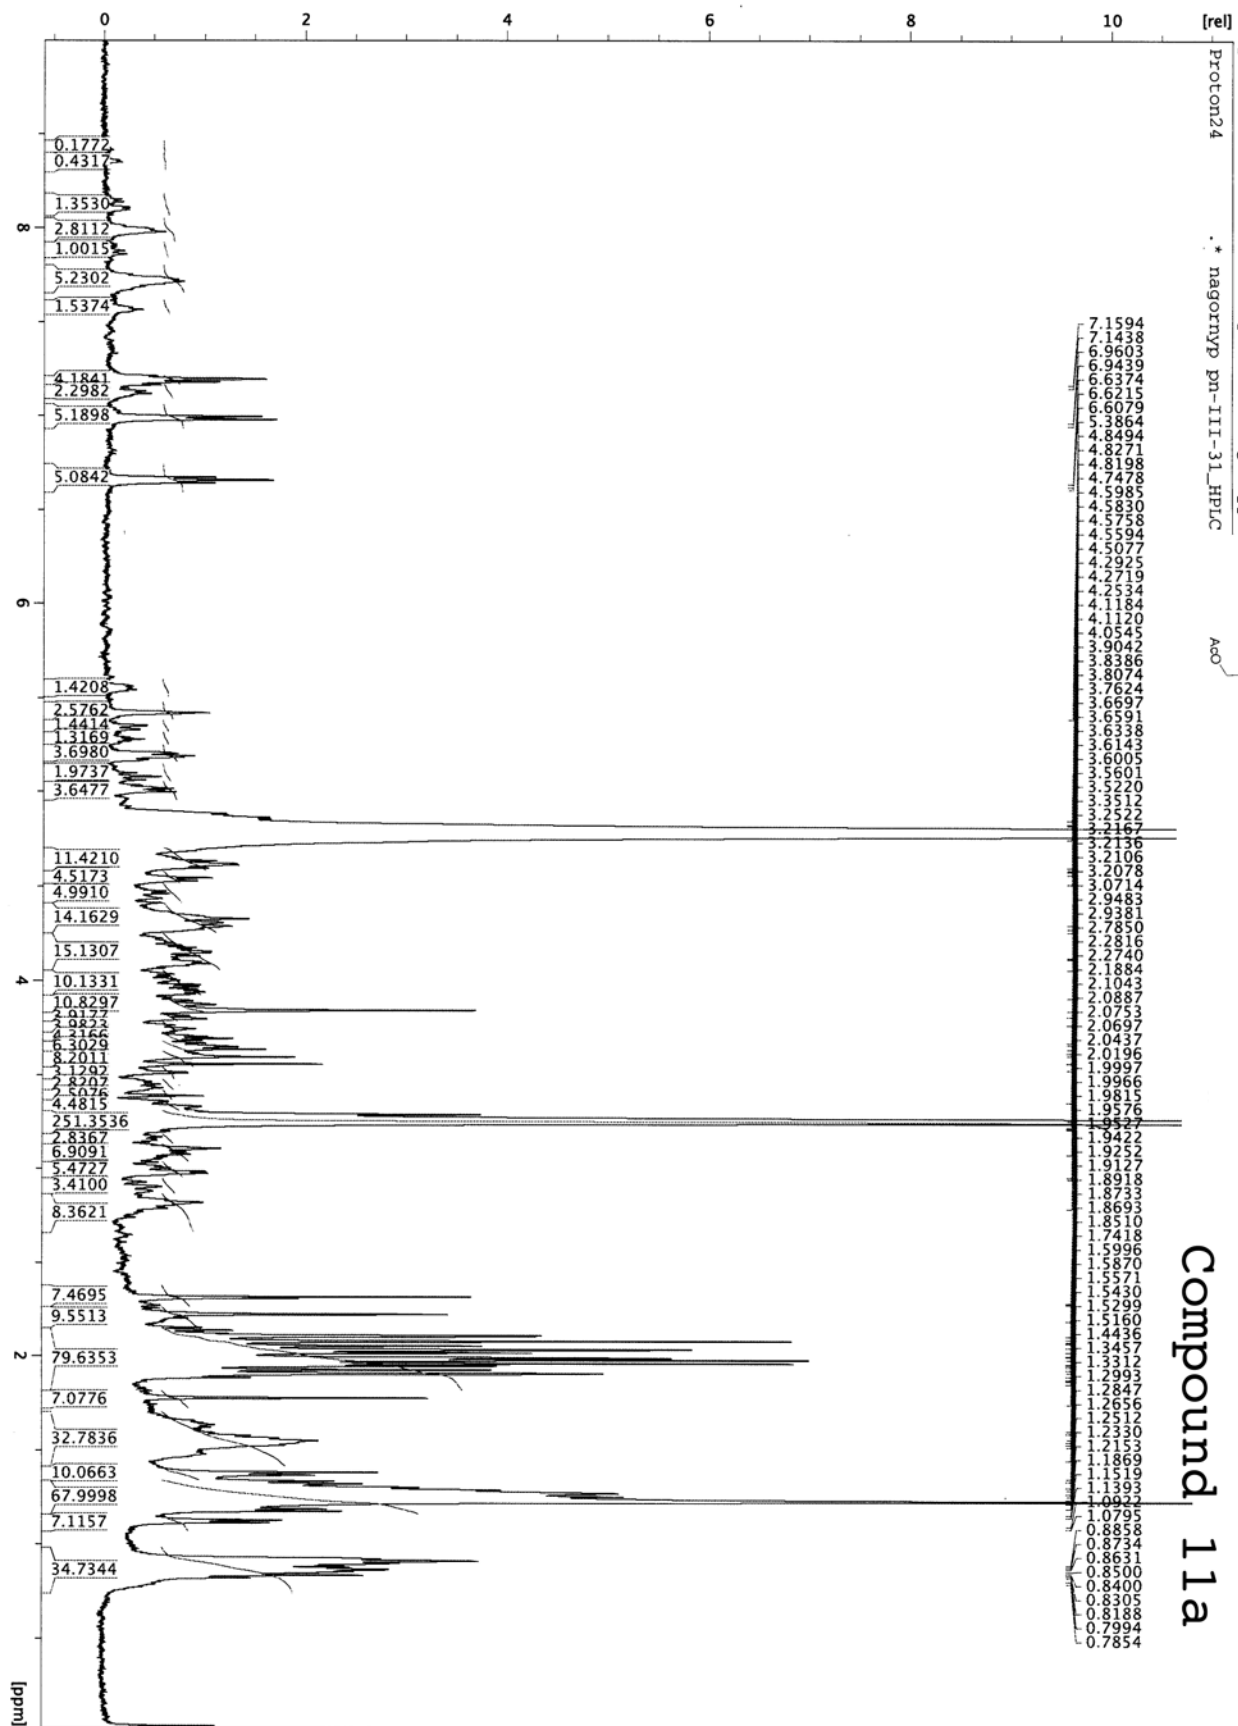







pn-III-58\_1hb 10 1 /opt/users/nagornyp  
 pn-III-58\_1hb 10 1 /opt/users/nagornyp

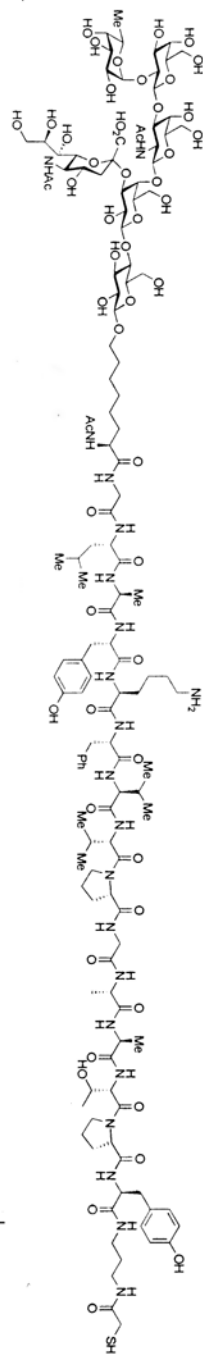

Compound 11

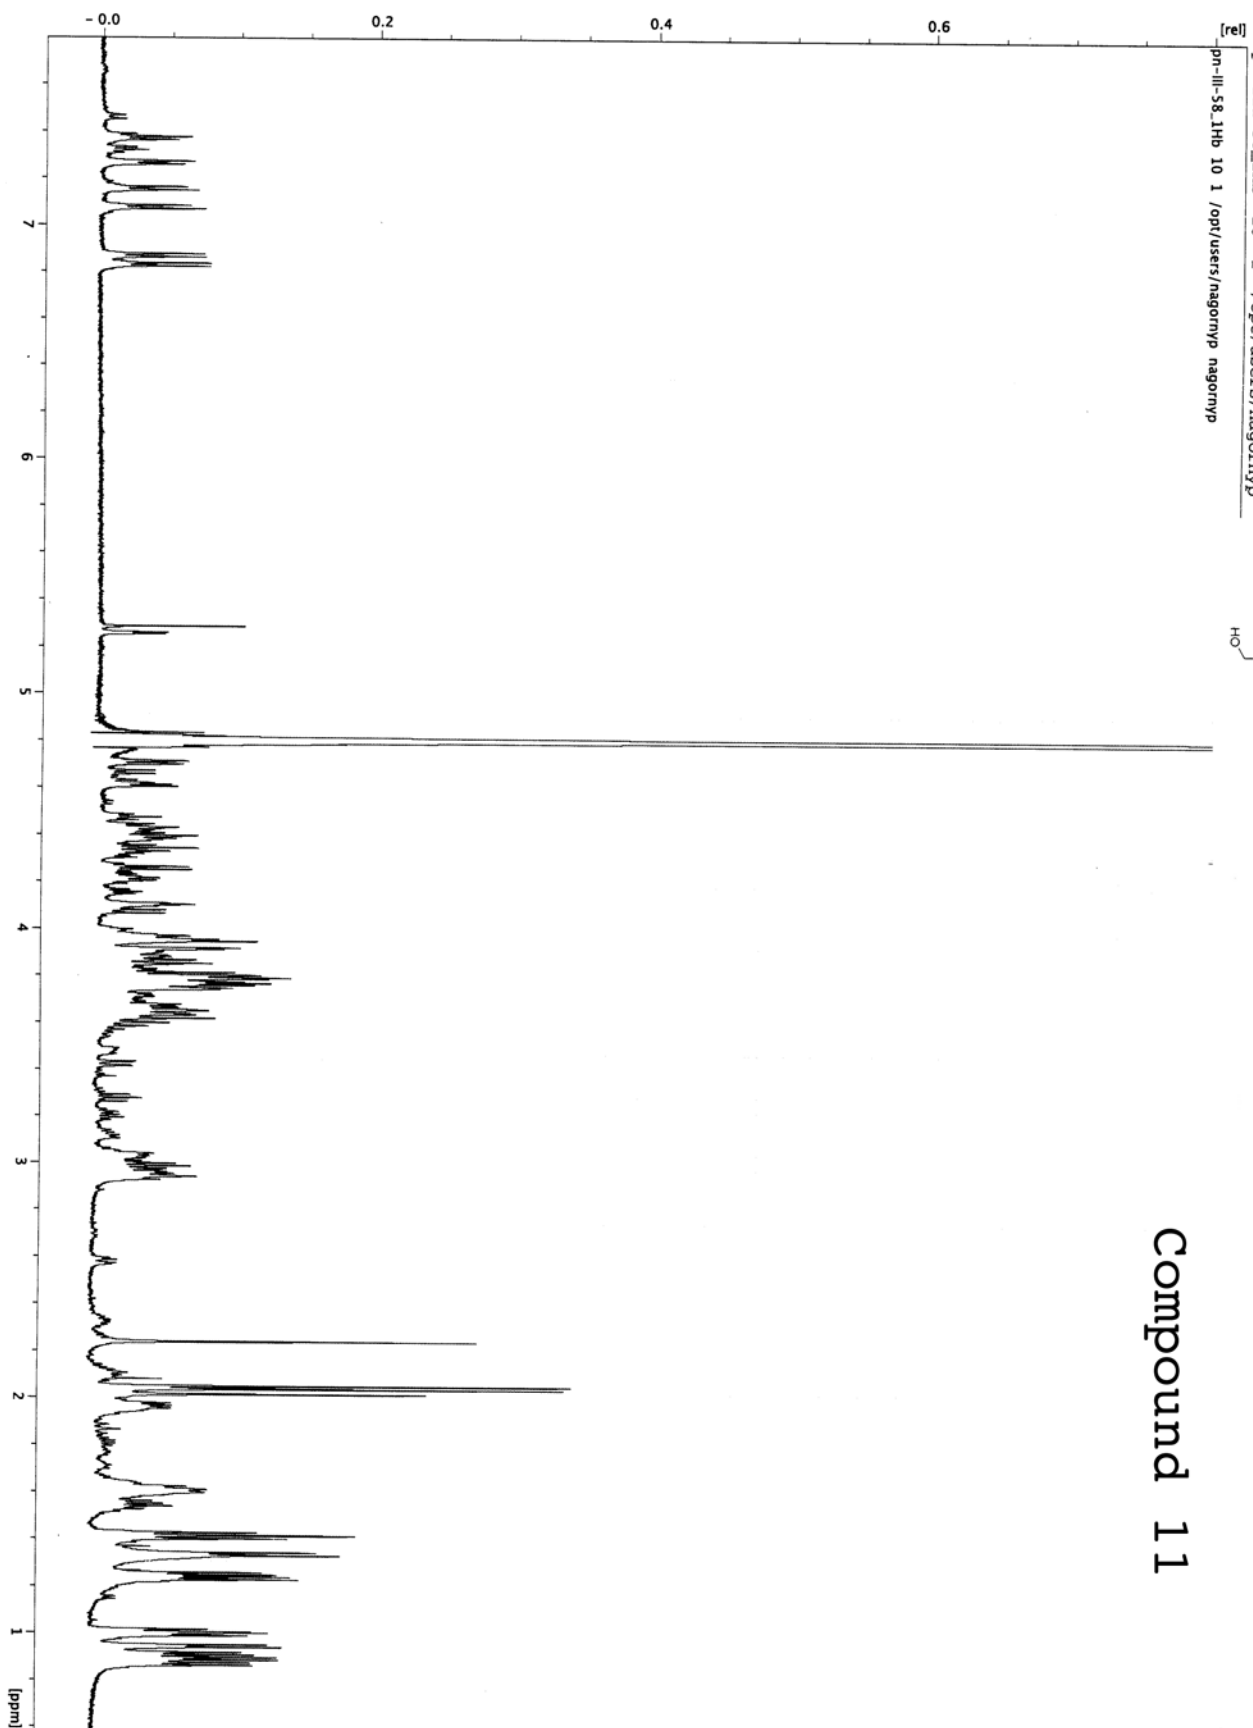

SI-27

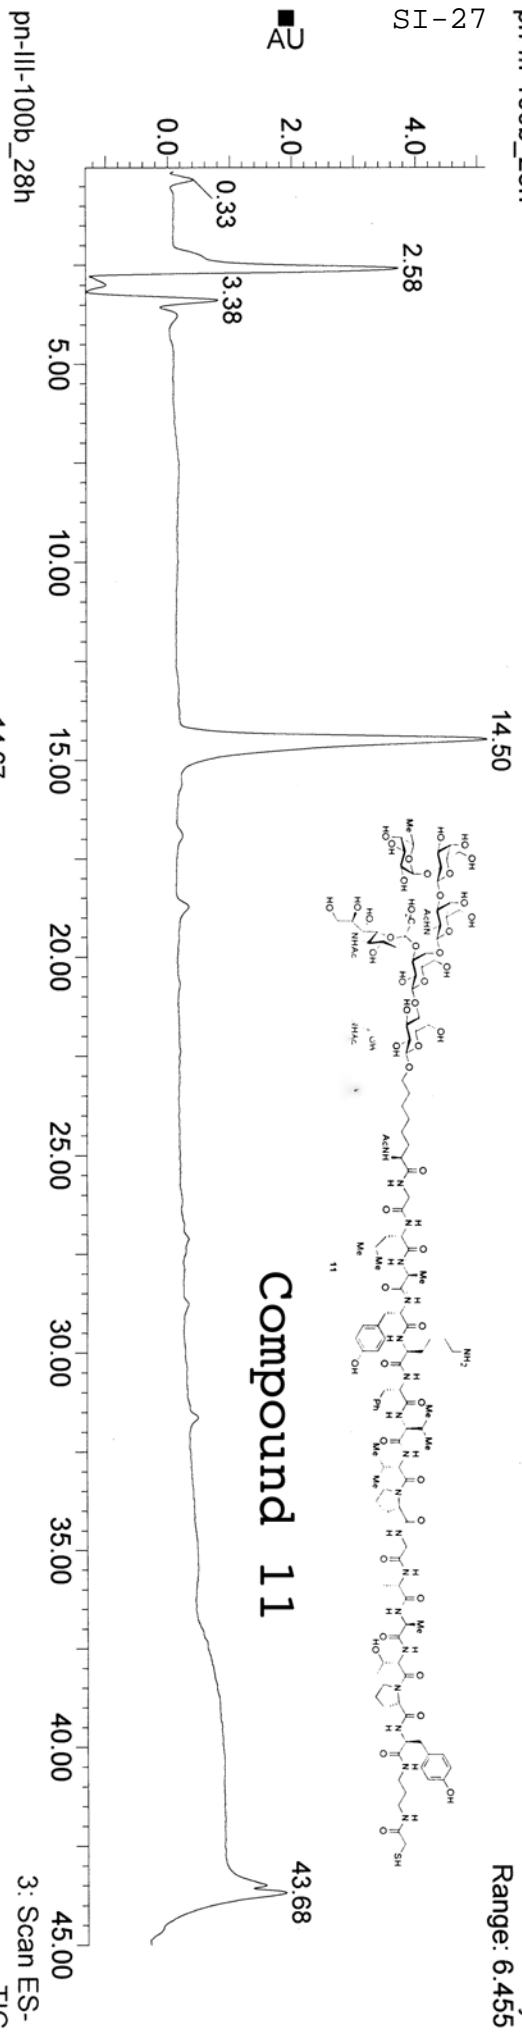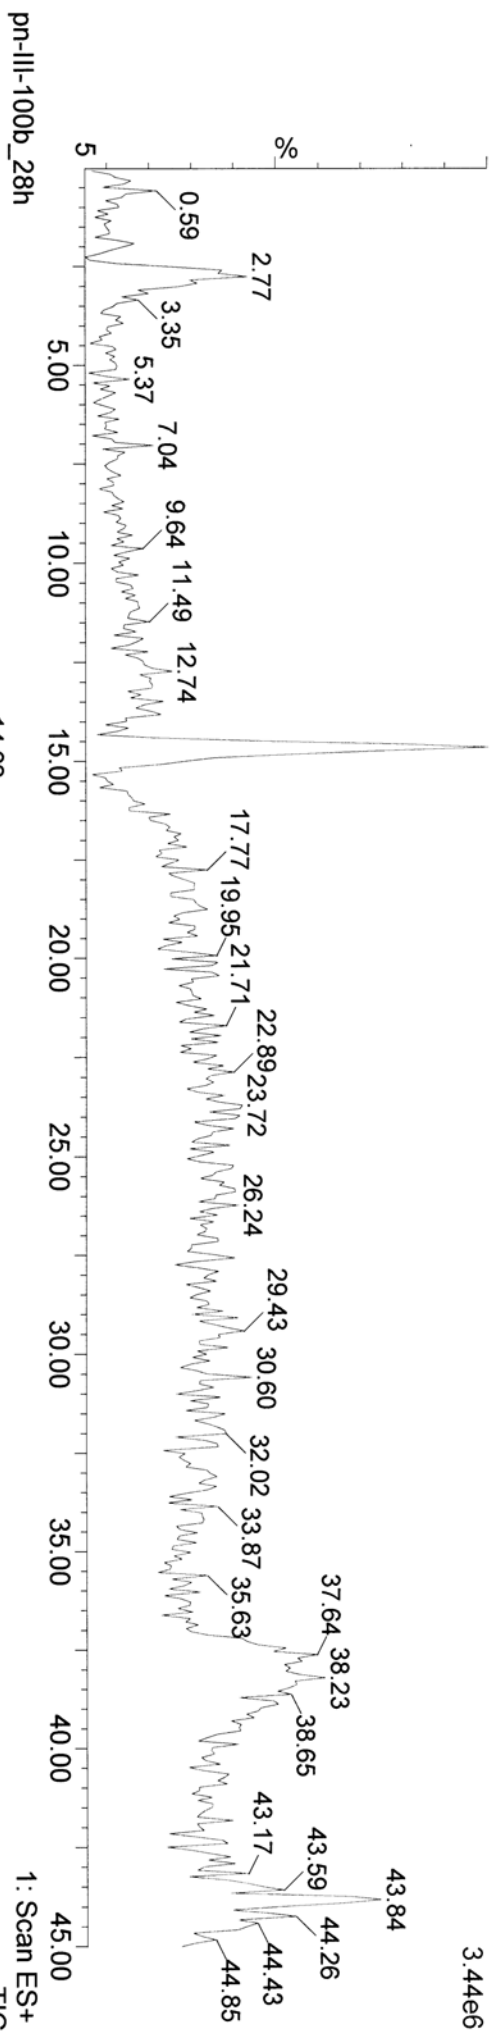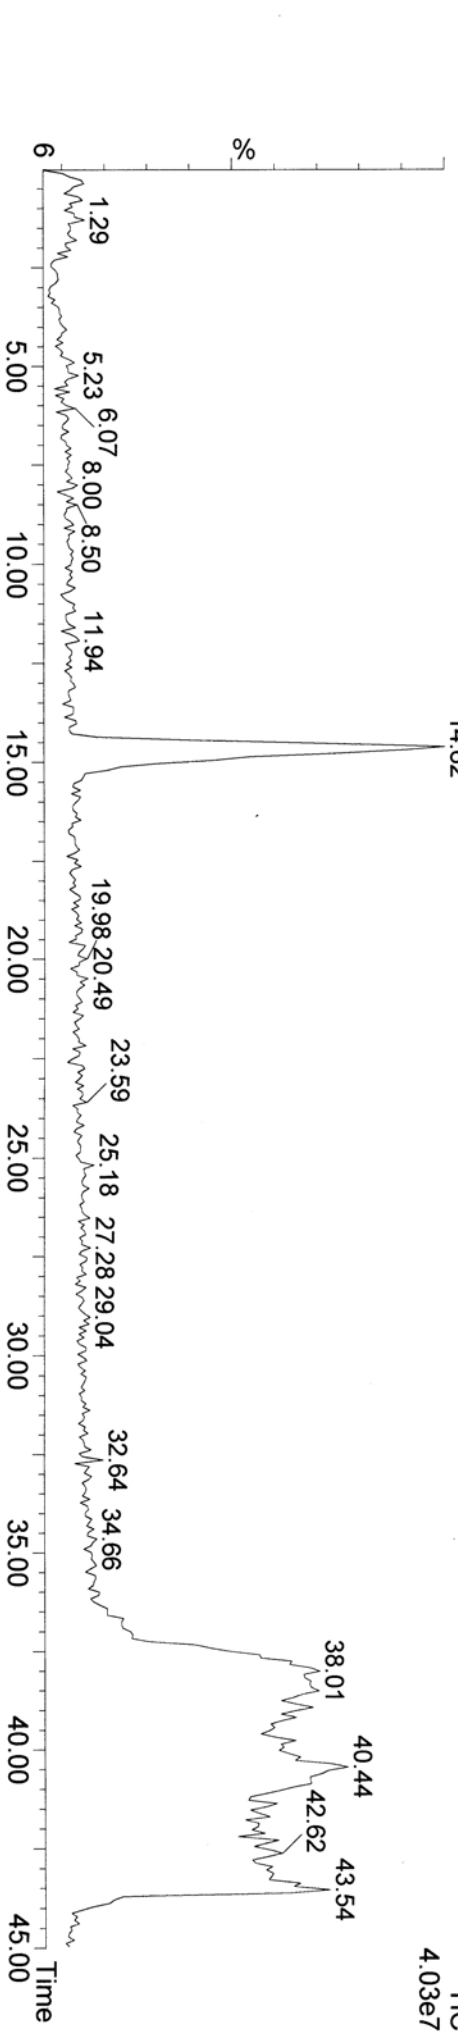

1: Scan ES+  
TIC  
4.03e7

3: Scan ES-  
TIC  
3.44e6

C18\_10-85

pn-III-100b\_28h 175 (14.671) Cm (171:183)

3: Scan ES-  
4.84e4

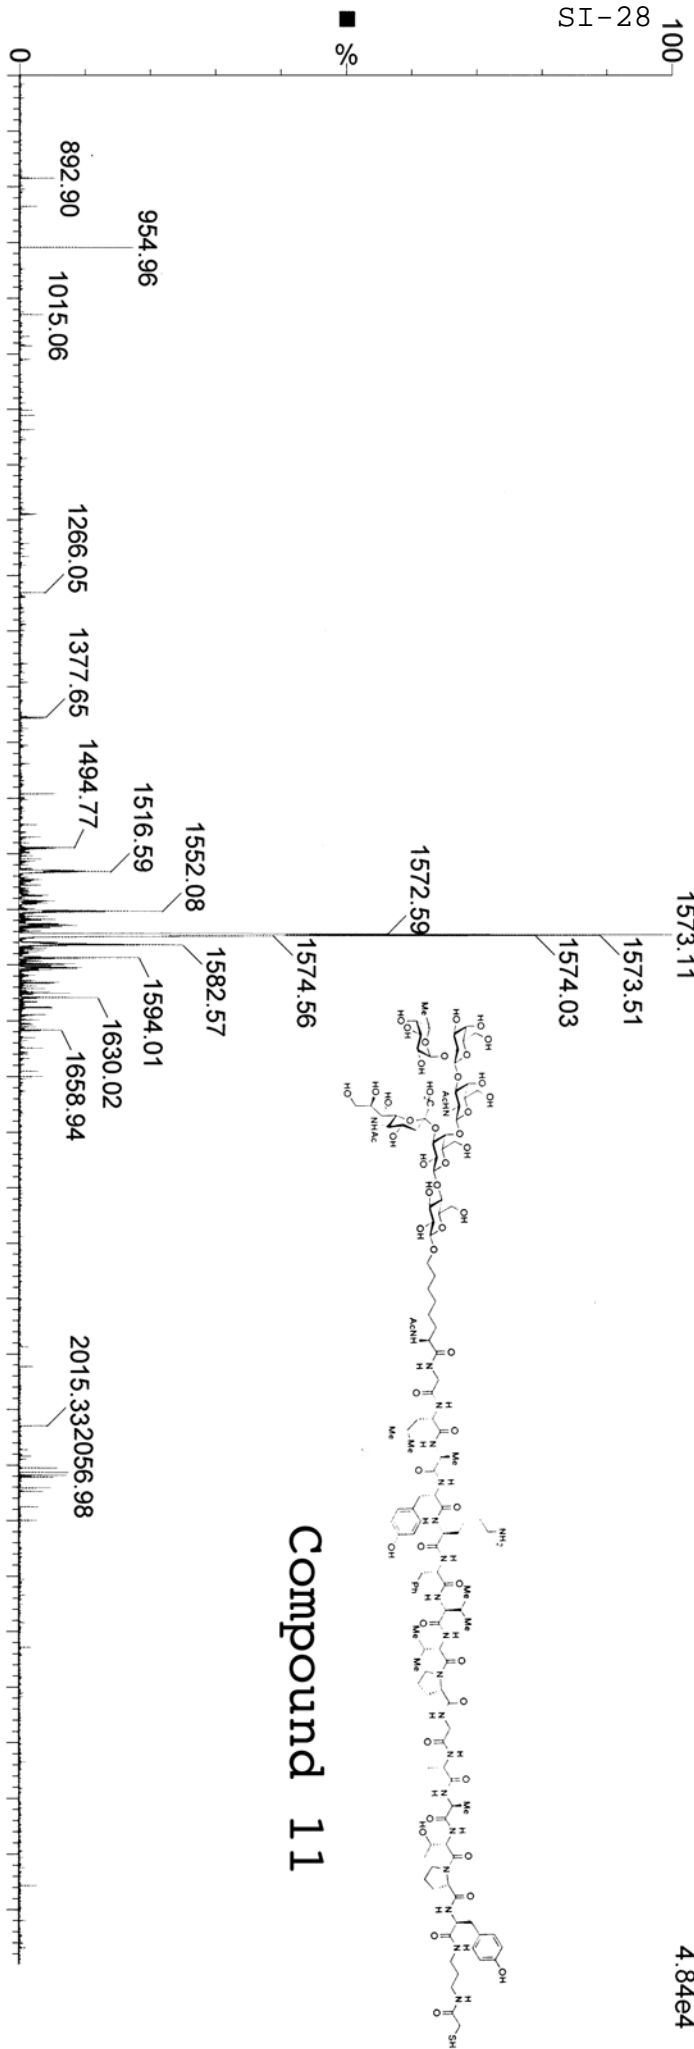

Compound 11

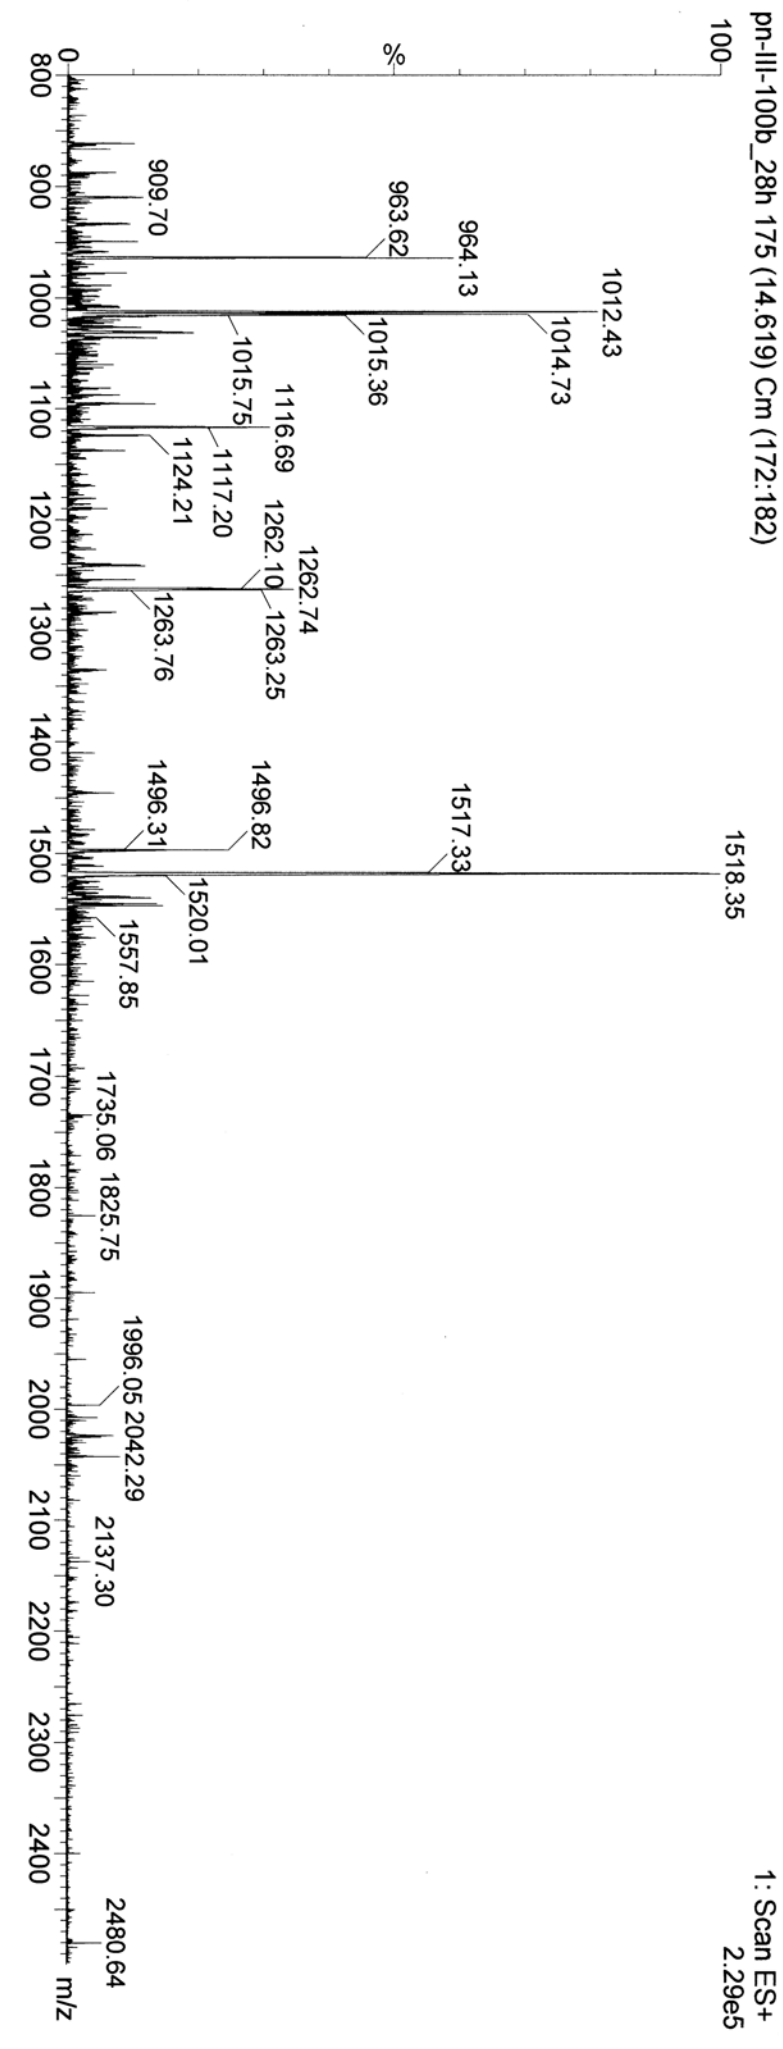

1: Scan ES+  
2.29e5
